# Supplementary material for: Gender Differences in the Prevalence of Parkinson's Disease
Source: PubMed Central journal article supplement (PMC9847309; doi:10.1002/mdc3.13584), 2022-11-14
Supplement: MDC3-10-86-s001.pdf [file MDC3-10-86-s001.pdf]

| Author         | Year | Authoryear           | Prevalence_M | PD_M   | Total_M   | NonPD_M   | Prevalence_F | PD_F   | Total_F   | NonPD_F   | Total_cases | Total_pop | OPR    | Ln_ODR  | Lower_CI_95 | Upper_CI_95 | Ln_lower_CI_95 | Ln_upper_CI_95 | Age_group | Country_reclass | Continent | Study_type | Median_age | Life_expectancy_M | Life_expectancy_F | F_to_M_difference_in_Life_expectancy | Publication_year | Update |
|----------------|------|----------------------|--------------|--------|-----------|-----------|--------------|--------|-----------|-----------|-------------|-----------|--------|---------|-------------|-------------|----------------|----------------|-----------|-----------------|-----------|------------|------------|-------------------|-------------------|--------------------------------------|------------------|--------|
| Orazco         | 2020 | Orazco, 2020         | 175          | 1750   | 1000000   | 998250    | 141.91       | 1514   | 1066873   | 1066359   | 3264        | 2066873   | 1.2332 | 0.2096  | 1.3153      | 1.3209      | 0.3409         | 0.2783         | 0         | 2               | SAm       | 2          | 79         | 74                | 80.15             | 6.35                                 | 2010-present     | 1      |
| Eusebi         | 2019 | Eusebi, 2019         | 540          | 2628   | 486607    | 484039    | 544          | 2848   | 523529    | 520681    | 5476        | 1011186   | 0.9926 | -0.0074 | 0.9415      | 1.0465      | -0.0603        | 0.0455         | 2         | 1               | Europe    | 2          | 82         | 79.47             | 84.22             | 4.75                                 | 2010-present     | 1      |
| Han            | 2019 | Han, 2019            | 113.1        | 38157  | 33737401  | 33699244  | 116          | 54236  | 46755172  | 46700936  | 92393       | 80492573  | 0.975  | -0.0253 | 0.9623      | 0.9878      | -0.0384        | -0.0122        | 0         | 1               | Asia      | 2          | 72         | 77.12             | 83.78             | 6.66                                 | 2010-present     | 1      |
| Park           | 2019 | Park, 2019           | 108.4        | 32002  | 29522140  | 29490138  | 170.8        | 48745  | 28519227  | 28490482  | 80747       | 58061167  | 0.6347 | -0.4547 | 0.6258      | 0.6437      | -0.4688        | -0.4406        | 0         | 1               | Asia      | 2          | 85         | 77.12             | 83.78             | 6.66                                 | 2010-present     | 1      |
| Finny          | 2018 | Finny, 2018          | 223.7        | 227697 | 101746768 | 101559071 | 154.5        | 242815 | 157161812 | 156918997 | 470512      | 258945800 | 1.4478 | 0.3701  | 1.4396      | 1.4562      | 0.3644         | 0.3758         | 0         | 1               | Europe    | 2          | 75         | 80.03             | 84.18             | 4.15                                 | 2010-present     | 1      |
| Kadastik-Erme  | 2018 | Kadastik-Erme, 2018  | 355          | 160    | 45070     | 44910     | 294          | 271    | 92177     | 91906     | 481         | 137247    | 1.2075 | 0.1885  | 0.9935      | 1.4676      | -0.0665        | 0.3836         | 0         | 1               | Europe    | 2          | 77         | 70.86             | 80.45             | 9.59                                 | 2010-present     | 1      |
| Marras         | 2018 | Marras, 2018         | 667          | 20366  | 3053173   | 3031007   | 488          | 23491  | 4811730   | 4790239   | 43857       | 7867103   | 1.3668 | 0.3125  | 1.3415      | 1.3926      | 0.2938         | 0.3312         | 3         | 1               | NAm       | 2          | 80         | 78.56             | 80.8              | 2.24                                 | 2010-present     | 1      |
| Valent         | 2018 | Valent, 2018         | 747.08       | 2270   | 303850    | 301500    | 585.33       | 2465   | 421130    | 418665    | 4735        | 724980    | 1.2763 | 0.244   | 1.2058      | 1.351       | 0.3872         | 0.3008         | 0         | 1               | Europe    | 2          | 77         | 79.47             | 84.22             | 4.75                                 | 2010-present     | 1      |
| Nerius         | 2017 | Nerius, 2017         | 820          | 2002   | 244146    | 242144    | 779          | 2734   | 350963    | 348229    | 4736        | 595109    | 1.0526 | 0.0513  | 0.9939      | 1.1148      | -0.0061        | 0.1087         | 0         | 1               | Europe    | 2          | 77         | 77.78             | 82.54             | 4.76                                 | 2010-present     | 1      |
| Khan           | 2016 | Khan, 2016           | 530          | 8      | 1509      | 1501      | 300          | 3      | 1000      | 997       | 11          | 2509      | 1.7667 | 0.5691  | 0.4698      | 6.6433      | -0.7554        | 1.8936         | 4         | 2               | Asia      | 1          | 72         | 61.53             | 63.9              | 2.37                                 | 2010-present     | 1      |
| Bin            | 2015 | Bin, 2015            | 304          | 95716  | 31485526  | 31389810  | 312          | 104557 | 33511859  | 33407302  | 200273      | 64997385  | 0.9744 | -0.026  | 0.9659      | 0.9829      | -0.0347        | -0.0172        | 1         | 1               | Europe    | 2          | 80         | 77.86             | 84.34             | 6.38                                 | 2010-present     | 1      |
| Kheir          | 2015 | Kheir, 2015          | 503          | 21     | 4175      | 4154      | 363          | 35     | 8032      | 1.3857    | 0.3262      | 0.7056    | 2.7211 | -0.3487 | 1.001       | 0.07        | 0              | 2              | Africa    | 1               | 67        | 67.82      | 72.69      | 4.87              | 2010-present      | 1                                    |                  |        |
| Yang           | 2015 | Yang, 2015           | 1680         | 51     | 3036      | 2985      | 1280         | 37     | 2891      | 2854      | 88          | 5926      | 1.3125 | 0.2719  | 0.8622      | 1.998       | -0.1483        | 0.6921         | 0         | 2               | Asia      | 1          | 70         | 72.26             | 77.94             | 5.68                                 | 2010-present     | 1      |
| Zou            | 2014 | Zou, 2014            | 2440         | 219    | 8975      | 8756      | 1460         | 6      | 421       | 405       | 225         | 9386      | 1.6712 | 0.5136  | 0.472       | 3.7381      | -0.2914        | 1.3186         | 8         | 1               | Asia      | 2          | 85         | 72.26             | 77.94             | 5.68                                 | 2010-present     | 1      |
| El-Fallawy     | 2013 | El-Fallawy, 2013     | 204.38       | 20     | 8320      | 8300      | 181.53       | 13     | 7162      | 7149      | 33          | 15482     | 1.3243 | 0.2809  | 0.6593      | 2.6604      | -0.4166        | 0.9785         | 2         | 1               | Africa    | 1          | 65         | 67.82             | 72.69             | 4.87                                 | 2010-present     | 1      |
| Gordon         | 2012 | Gordon, 2012         | 1012         | 1322   | 130632    | 129310    | 697.2        | 1291   | 185169    | 183878    | 2613        | 315802    | 1.4515 | 0.3726  | 1.3448      | 1.5667      | 0.2962         | 0.449          | 2         | 2               | NAm       | 2          | 70         | 78.56             | 80.8              | 2.24                                 | 2010-present     | 1      |
| Lohk           | 2012 | Lohk, 2012           | 213.18       | 2227   | 997748    | 995621    | 179.74       | 1836   | 1021479   | 1019639   | 3963        | 2019224   | 1.186  | 0.1706  | 1.1143      | 1.2624      | 0.1082         | 0.233          | 0         | 2               | Europe    | 2          | 74         | 79.41             | 83.15             | 3.74                                 | 2010-present     | 1      |
| Seijo-Martinez | 2011 | Seijo-Martinez, 2011 | 2860         | 9      | 315       | 306       | 1370         | 6      | 438       | 432       | 15          | 753       | 2.0876 | 0.736   | 0.7507      | 5.8056      | -0.2868        | 1.7588         | 2         | 1               | Europe    | 1          | 80         | 78.76             | 84.58             | 5.82                                 | 2010-present     | 1      |
| Osaki          | 2011 | Osaki, 2011          | 88           | 43     | 48864     | 48821     | 129          | 73     | 56589     | 56516     | 116         | 105453    | 0.6822 | -0.3825 | 0.4681      | 0.9941      | -0.7591        | -0.0059        | 0         | 1               | Asia      | 2          | 75         | 79.46             | 85.77             | 6.31                                 | 2010-present     | 1      |
| Das            | 2008 | Das, 2008            | 216          | 6      | 2772      | 2766      | 451          | 12     | 2658      | 2646      | 18          | 5430      | 0.4789 | -0.7362 | 0.1799      | 1.2753      | -1.7156        | 0.2432         | 6         | 2               | Asia      | 1          | 80         | 66.69             | 68.94             | 3.25                                 | 2000-2010        | 0      |
| Barbosa        | 2006 | Barbosa, 2006        | 3800         | 17     | 447       | 430       | 3000         | 22     | 733       | 711       | 39          | 1181      | 1.2667 | 0.2364  | 0.6801      | 2.3591      | -0.3855        | 0.8583         | 7         | 2               | SAm       | 1          | 82         | 70.57             | 77.98             | 7.41                                 | 2000-2010        | 0      |
| Zhang          | 2005 | Zhang, 2005          | 1040         | 130    | 12500     | 12370     | 890          | 147    | 16517     | 16370     | 277         | 29017     | 1.1685 | 0.1558  | 0.924       | 1.4778      | -0.0791        | 0.3906         | 5         | 1               | Asia      | 1          | 80         | 72.26             | 77.94             | 5.68                                 | 2000-2010        | 0      |
| Zhang b        | 2005 | Zhang b, 2005        | 614          | 41     | 6678      | 6627      | 459          | 45     | 9804      | 9759      | 86          | 16481     | 1.3377 | 0.2909  | 0.8772      | 2.04        | -0.1311        | 0.713          | 4         | 2               | Asia      | 1          | 63         | 72.26             | 77.94             | 5.68                                 | 2000-2010        | 0      |
| Berganec       | 2004 | Berganec, 2004       | 1390         | 6      | 462       | 456       | 1600         | 12     | 750       | 738       | 18          | 1212      | 0.8125 | -0.2076 | 0.307       | 2.15        | -1.8088        | 0.7655         | 7         | 2               | Europe    | 1          | 80         | 78.76             | 84.58             | 5.82                                 | 2000-2010        | 0      |
| Tan            | 2004 | Tan, 2004            | 310          | 25     | 8065      | 8040      | 2000         | 21     | 10500     | 10479     | 46          | 18565     | 1.55   | 0.4383  | 0.8683      | 2.7668      | -0.1412        | 1.0177         | 4         | 1               | Asia      | 1          | 75         | 79.36             | 84.01             | 4.65                                 | 2000-2010        | 0      |
| Benito-Leon    | 2003 | Benito-Leon, 2003    | 1900         | 43     | 2263      | 2220      | 1200         | 38     | 3167      | 3129      | 81          | 5430      | 1.5833 | 0.4595  | 1.0268      | 2.4414      | 0.0265         | 0.8926         | 7         | 2               | Europe    | 1          | 77         | 78.76             | 84.58             | 5.82                                 | 2000-2010        | 0      |
| Nicotri        | 2003 | Nicotri, 2003        | 248          | 2      | 806       | 804       | 323          | 3      | 929       | 926       | 5           | 1735      | 0.7678 | -0.2642 | 0.2386      | 4.5837      | -2.051         | 1.5225         | 2         | 2               | SAm       | 1          | 55         | 79.47             | 84.22             | 4.75                                 | 2000-2010        | 0      |
| Zhang          | 2003 | Zhang, 2003          | 1200         | 30     | 2500      | 2470      | 1100         | 34     | 3091      | 3057      | 64          | 5591      | 1.0909 | 0.087   | 0.6696      | 1.7774      | -0.4011        | 0.5751         | 5         | 2               | Asia      | 1          | 80         | 72.26             | 77.94             | 5.68                                 | 2000-2010        | 0      |
| Kis            | 2002 | Kis, 2002            | 4800         | 6      | 336       | 330       | 1680         | 6      | 414       | 408       | 12          | 750       | 2.8571 | 1.0498  | 0.93        | 8.7779      | -0.0726        | 2.1722         | 6         | 1               | Europe    | 1          | 80         | 79.47             | 84.22             | 4.75                                 | 2000-2010        | 0      |
| Wang           | 1996 | Wang, 1996           | 610          | 12     | 1967      | 1955      | 564          | 11     | 1950      | 1939      | 23          | 3918      | 1.0816 | 0.0784  | 0.4784      | 2.4453      | -0.7373        | 0.8942         | 4         | 1               | Asia      | 1          | 71         | 69.34             | 74.15             | 4.81                                 | 1990-2000        | 0      |
| Trenkwalder    | 1995 | Trenkwalder, 1995    | 1270         | 5      | 394       | 389       | 340          | 2      | 588       | 586       | 7           | 982       | 3.7353 | 1.3178  | 0.7283      | 19.1577     | -0.3171        | 7              | 1         | Europe          | 1         | 78         | 75.04      | 80.92             | 5.88              | 1990-2000                            | 0                |        |
| Wang           | 1994 | Wang, 1994           | 2212.39      | 5      | 226       | 221       | 390.63       | 1      | 256       | 255       | 6           | 482       | 5.6637 | 1.7341  | 0.6666      | 48.1195     | -0.4055        | 3.8737         | 4         | 2               | Asia      | 1          | 77         | 69.34             | 74.15             | 4.81                                 | 1990-2000        | 0      |

| Legend                               | Header                               | Explanation                                                     |
|--------------------------------------|--------------------------------------|-----------------------------------------------------------------|
| Author                               | Header                               | Explanation                                                     |
| Year                                 | Year                                 | Year of publication                                             |
| Authoryear                           | Authoryear                           | Reported male prevalence / 100,000 persons                      |
| Prevalence_M                         | Prevalence_M                         | Reported male prevalence / 100,000 persons                      |
| PD_M                                 | PD_M                                 | Number of male PD cases                                         |
| Total_M                              | Total_M                              | Total number of males in population                             |
| NonPD_M                              | NonPD_M                              | Number of males without PD                                      |
| Prevalence_F                         | Prevalence_F                         | Reported female prevalence / 100,000 persons                    |
| PD_F                                 | PD_F                                 | Number of female PD cases                                       |
| Total_F                              | Total_F                              | Total number of females in population                           |
| NonPD_F                              | NonPD_F                              | Number of females without PD                                    |
| Total_cases                          | Total_cases                          | Total number of PD cases in population                          |
| Total_pop                            | Total_pop                            | Total population                                                |
| OPR                                  | OPR                                  | Overall prevalence rate (Male-to-Female)                        |
| Ln_ODR                               | Ln_ODR                               | Natural logarithm of OPR                                        |
| Lower_CI_95                          | Lower_CI_95                          | 95% lower CI                                                    |
| Upper_CI_95                          | Upper_CI_95                          | 95% upper CI                                                    |
| Ln_lower_CI_95                       | Ln_lower_CI_95                       | Natural logarithm of 95% lower CI                               |
| Ln_upper_CI_95                       | Ln_upper_CI_95                       | Natural logarithm of 95% upper CI                               |
| Age_group                            | Age_group                            | Age groups included in study 0 - all ages                       |
| Country_reclass                      | Country_reclass                      | Economic profile of country 1 - HIC 2 - LMIC                    |
| Continent                            | Continent                            | Study continent                                                 |
| Study_type                           | Study_type                           | Study design 1 - Door-to-door 2 - Predictive                    |
| Median_age                           | Median_age                           | Median age at inclusion                                         |
| Life_expectancy_M                    | Life_expectancy_M                    | Male life expectancy at birth based on WHO data                 |
| Life_expectancy_F                    | Life_expectancy_F                    | Female life expectancy at birth based on WHO data               |
| F_to_M_difference_in_Life_expectancy | F_to_M_difference_in_Life_expectancy | Difference between female and male life expectancy              |
| Publication_year                     | Publication_year                     | Year of publication 1990-2000 2000-2010 2010-present            |
| Update                               | Update                               | Article from new/old search 1 - New search 0 - Pringhitng et al |
